# Supplementary material for: The Median Eminence, A New Oligodendrogenic Niche in the Adult Mouse Brain
Source: PubMed Central journal article supplement — Stem Cell Reports. 2020 May 14;14(6):1076–92. doi: 10.1016/j.stemcr.2020.04.005 (PMC7355143; doi:10.1016/j.stemcr.2020.04.005), 2020-05-14
Supplement: mmc1.pdf [file mmc1.pdf]

**Stem Cell Reports, Volume 14**

**Supplemental Information**

**The Median Eminence, A New Oligodendrogenic Niche in the Adult  
Mouse Brain**

**Rina Zilkha-Falb, Nathali Kaushansky, and Avraham Ben-Nun**

## Supplemental information

### Supplementary figures and legends

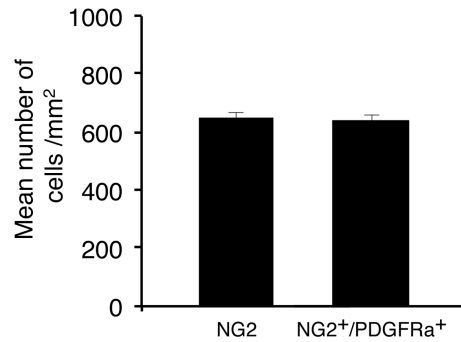

**Figure S1** Quantitative analysis of NG2<sup>+</sup> and NG2<sup>+</sup>/PDGFRa<sup>+</sup> in the ME of naïve mice calculated as mean number of marker/s positive cells per mm<sup>2</sup>, ( $n=4$  for each group).

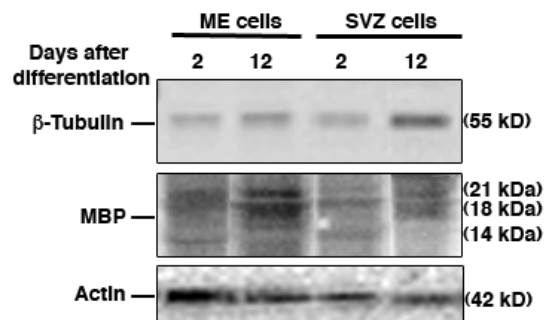

**Figure S2** Western blot analysis of neuronal ( $\beta$ -Tubulin) and oligodendrocyte (MBP) markers following differentiation of ME- or SVZ-NSCs.

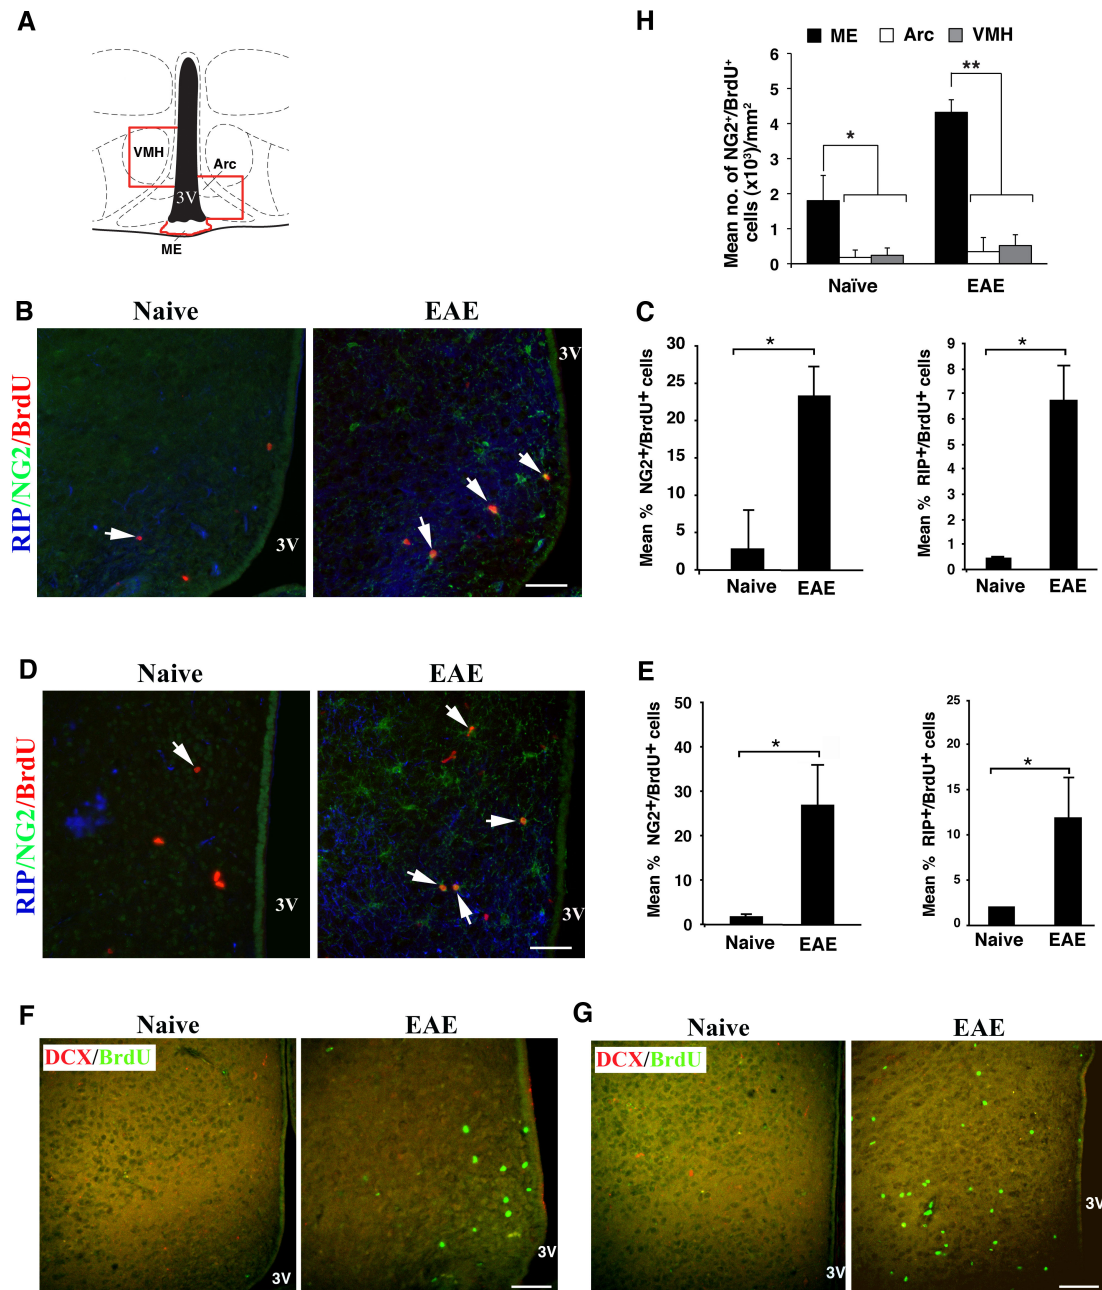

**Figure S3** EAE induces oligodendrogenesis in the Arc and VMH of the hypothalamus (A) Schematic draw of the hypothalamus regions that were analyzed (B) Confocal images of double staining NG2<sup>+</sup>/BrdU<sup>+</sup> and RIP<sup>+</sup>/BrdU<sup>+</sup> in the Arc. bar=50μm. (C) Quantitative analysis of NG2<sup>+</sup>/BrdU<sup>+</sup> and RIP<sup>+</sup>/BrdU<sup>+</sup> in the Arc. Left: \*p<0.006, right: \*p=0.03 (D) Confocal images of double staining NG2<sup>+</sup>/BrdU<sup>+</sup> or RIP<sup>+</sup>/BrdU<sup>+</sup> in the VMH. bar=50μm. (E) Quantitative analysis of NG2<sup>+</sup>/BrdU<sup>+</sup> in the VMH \*p=0.03, Two-tails student T test. (F) Images show no DCX staining in Arc in naïve and EAE

mice. bar=50 $\mu$ m. (G) Images show no DCX staining in VMH in naïve and EAE mice.

bar=50 $\mu$ m. (H) Quantitative analysis of percentage of NG2<sup>+</sup>/BrdU<sup>+</sup> cells in ME compare Arc and VMH in Naïve and EAE mice (n=4) ; \* p=0.04 ; \*\* p=0.01.

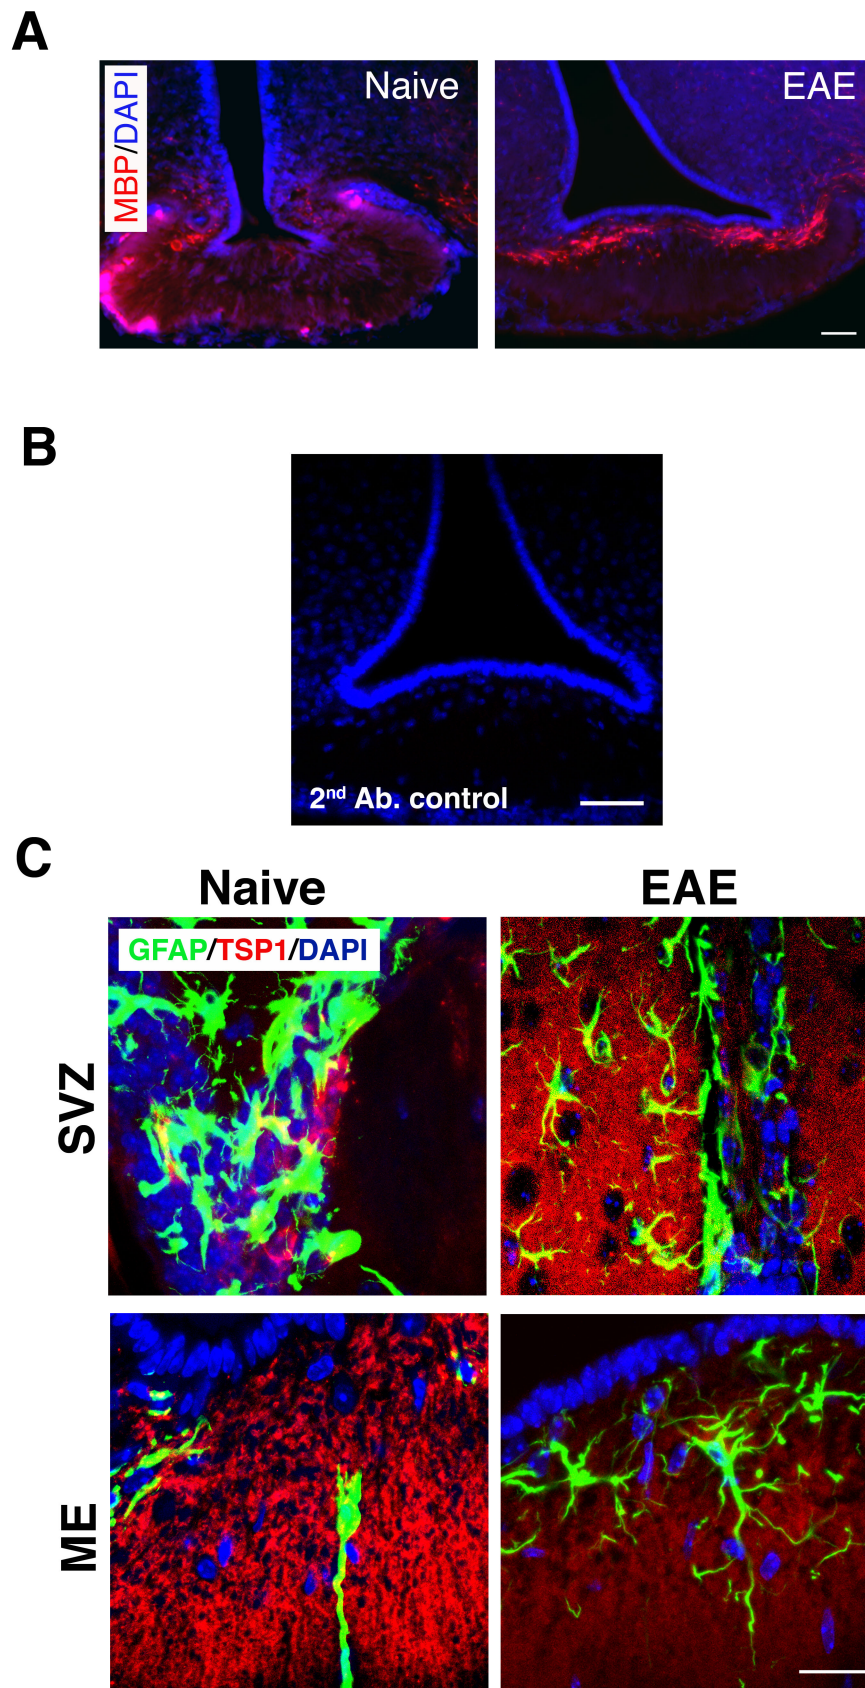

**Figure S4 (A)** MBP immunostaining in ME of naïve and EAE mice. bar=50 $\mu$ m.

(B) Negative control staining with only secondary antibody (C) Low power images of TSP1 from sections shown in Fig. 4F. bar=50 $\mu$ m.

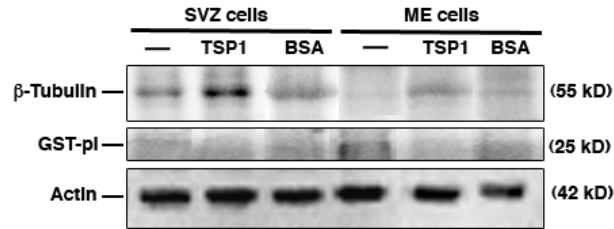

**Figure S5** Western blot analysis of neuronal ( $\beta$ -Tubulin) and oligodendrocyte (GST-pI) markers following differentiation of ME- or SVZ-NSCs in presence of TSP1.

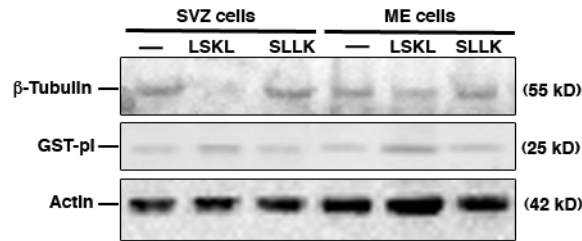

**Figure S6** Western blot analysis of neuronal ( $\beta$ -Tubulin) and oligodendrocyte (GST-pI) markers following differentiation of ME- or SVZ-NSCs in presence of TSP1 antagonist (LSKL) or agonist (SLLK).

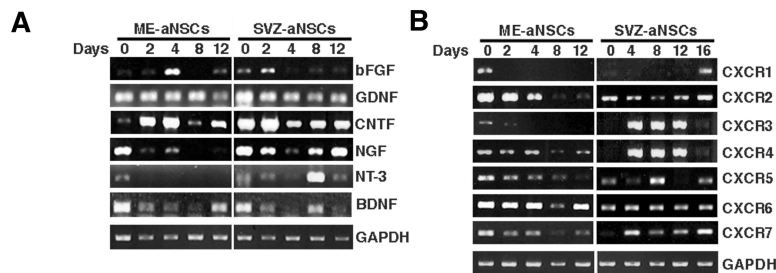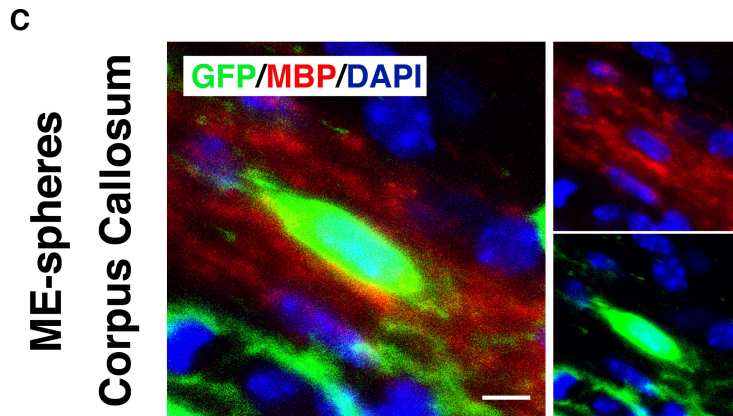

**Figure S7** temporal expression profile of chemokine receptors (A) and neurotrophic factors (B) by ME-originated cells are distinct from these expressed by SVZ-originated cells. Semiquantitative RT-PCR of cDNA reverse transcribed from total RNA extracted from ME-NSCs compare SVZ-NSCs at elevated time points following differentiation. Undifferentiated NSCs (day 0) served as control. GAPDH expression was assessed as an internal standard. Results are representative of three repeats. (C) Single GFP<sup>+</sup>/MBP<sup>+</sup> cell derived from ME-NS in the CC demonstrating short MBP-positive profiles at the periphery of the GFP-positive soma. bar=20μm.

### Supplemental table 1

#### List of used antibodies

| Antibody                                               | Manufacture | Cat. No. |
|--------------------------------------------------------|-------------|----------|
| mouse anti-gial fibrillary acidic protein (GFAP)       | Sigma       | G-3893   |
| monoclonal mouse anti-NeuN                             | Chemicon    | MAB377   |
| rat anti-MBP                                           | Chemicon    | MAB386   |
| rabbit anti-NF200                                      | Sigma       | N4142    |
| goat anti-DCX                                          | Chemicon    | Sc-8066  |
| monoclonal mouse anti β-Tubulin III                    | Chemicon    | MAB1637  |
| rabbit anti NG2                                        | Chemicon    | AB5320   |
| rat anti BrdU                                          | Serotec     | MCA2060  |
| rat anti-platelet derived growth factor alpha (PDGFRα) | eBioscience | 14-1401  |
| rat anti MAC2                                          | Biolegend   | 125401   |
| rat anti CD45                                          | Biolegend   | 103101   |

#### Supplementary methods

**Semiquantitative RT-PCR analysis.** Total RNA was purified either from NSCs at time point 0 (undifferentiated NSCs) or from NSCs which were cultured in differentiation medium on PDL for elevated time points, using TRIzol Reagent (Invitrogen Corp.). cDNA was prepared from 1 μg of total RNA using MMLV-



reverse transcriptase (Promega, Madison, WI) and oligo-dT (Promega, Madison, WI) according to manufacturer's instructions. The cDNA mixture was diluted 1:5 with PCR-grade water. We examined the expression of specific mRNAs using semi-quantitative reverse transcription PCR (RT-PCR) with selected gene-specific primer pairs. The primers used were: TSP1, sense 5'- CAA GGG CTCAGGGATACTCAGG-3', antisense 5'- AGG TTT TGT CAT AGA TGG GTC C-3' (product size, 270 bp); CXCR1, sense 5'- GGC CGA GGC TGA ATA TTT CAT TCT-3', antisense 5'- GGT GGC ATG GAC GAT GGC CAG TAT-3' (product size, 450 bp); CXCR2, sense 5'- GGA GAA TTC AAG GTG GAT AAG-3', antisense 5'- AGT GTC TCT TCT GGA TCA GTG-3' (product size, 486 bp); CXCR3, sense 5'- GAG GTT AGT GAA CGT CAA GTG-3', antisense 5'- GGG GTC CCT GCG GTA GAT CTG-3' (product size, 482 bp); CXCR4, sense 5'- GGT CTG GAG ACT ATG ACT CC-3', antisense 5'- CAC AGA TGT ACC TGT CAT CC-3' (product size, 525 bp); CXCR6, sense 5'- ACA AAG ATG TTG CTG GCA GA-3', antisense 5'-GGC CTG TTT TCA GTC CCA TA-3' (product size, 219 bp); CXCR7, sense 5'- TTT GAG TTC AGG GGA GGA T-3', antisense 5'-GCT CGC TGA CAC CTA ACC TC-3' (product size, 202 bp); CCR1, sense 5'- ATG GAG ATT TCA GAT TTC ACA GAA-3', antisense 5'- GGC TAC AGG TAC GGT GAG TGA ACT-3' (product size, 510 bp); CCR2, sense 5'- ATG TTA CCT CAG TTC ATC CAC GGC-3', antisense 5'- GTA ATG GTG ATC ATC TTG TTT GGA-3' (product size, 506 bp); CCR3, sense 5'- ATG GCA TTC AAC ACA GAT GAA-3', antisense 5'- GTC ACA GTT CGG GCT CGA AGG-3' (product size, 512 bp); and GAPDH, sense 5'- CCA TCA ACG ACC CCT TCA TTG AC-3', antisense 5'- GGA TGA CCT TGC CCA CAG CCT TG-3' (product size, 580 bp).



The RT-PCR reactions were carried out using 100 ng of cDNA, 20 pmol of each primer, and Taq polymerase (Sigma-Aldrich, Israel) in a total volume of 20 µl. PCR reactions were carried out in a PTC-100 programmable Thermal controller (MJ Research, Inc) PCR system. Amplification included one stage of 5 min at 95°C followed by 35 cycles of 95°C for 30 s, 56°C for 1 min, 72°C for 1 min and 72°C for 10 min then reactions were kept at 4°C. As an internal standard for the amount of cDNA synthesized, we used GAPDH mRNA. PCR products were subjected to agarose gel analysis and visualized by ethidium bromide staining. In all cases one product was observed with each primer set, and the observed product had an amplicon size predicted from published cDNA sequences.

### **Western blot**

Cells were lysed (25 mM Tris-HCl pH 7.6, 150 mM NaCl, 1 mM EDTA, 1% Triton X-100, 1 mM Na<sub>3</sub>VO<sub>4</sub>, 100 nM, PMSF and protease inhibitor cocktail (1:50; Sigma-Aldrich). Lysis was done 1h/4°C then lysate was centrifuged 13,000rpm/30min/4°C and supernatant was collected. The protein content of cell lysates was determined using the BCA protein estimation kit (Pierce; Rockford, IL) with BSA as a standard. Proteins were denatured at 95°C for 5 minutes and further diluted in sample buffer (250 mM Tris-HCl pH 6.8 containing 4% SDS, 10% glycerol and 2% β-mercaptoethanol). Equal amounts of proteins were resolved on 10% SDS-PAGE and transferred onto nitrocellulose membrane (Invitrogen kit) for subsequent immunoblotting with antibodies specific for Tubulin beta (1:1000; Chemicon), MBP (1:2000; Chemicon), GST-pI (1:3000; Abcam). To control protein loading, blots were additionally stained with either anti-β-actin (1:5000; Abcam). Blots were analyzed by standard chemi-luminescence (Supersignal Kit, Pierce, Rockford, IL, USA) and visualization was done by a ChemiDoc™ XRS System (Bio-Rad).
